# Supplementary material for: Arthroscopic subacromial decompression for subacromial shoulder pain (CSAW): a multicentre, pragmatic, parallel group, placebo-controlled, three-group, randomised surgical trial
Source: PubMed Central journal article supplement — Lancet. 2018 Jan 27;391(10118):329–38. doi: 10.1016/S0140-6736(17)32457-1 (PMC5803129; doi:10.1016/s0140-6736(17)32457-1), 2018-01-27

# THE LANCET

## **Supplementary appendix**

This appendix formed part of the original submission and has been peer reviewed.  
We post it as supplied by the authors.

Supplement to: Beard DJ, Rees JL, Cook JA, et al. Arthroscopic subacromial decompression for subacromial shoulder pain (CSAW): a multicentre, pragmatic, parallel group, placebo-controlled, three-group, randomised surgical trial. *Lancet* 2017; published online Nov 20. [http://dx.doi.org/10.1016/S0140-6736\(17\)32457-1](http://dx.doi.org/10.1016/S0140-6736(17)32457-1).

## CSAW – Supplementary appendix

Supplementary Table 1. Number randomised by site

| Site                                                      | No randomised (%) |
|-----------------------------------------------------------|-------------------|
| Barnet General Hospital                                   | 7 (2%)            |
| Blackpool Victoria Hospital                               | 2 (1%)            |
| Buckinghamshire Healthcare NHS Trust (Wycombe)            | 8 (3%)            |
| Darlington Memorial Hospital                              | 6 (2%)            |
| Derriford Hospital (Plymouth)                             | 1 (<1%)           |
| Dorset County Hospital                                    | 11 (4%)           |
| Elective Orthopaedic Centre (Epsom)                       | 4 (1%)            |
| Frimley Park Hospital                                     | 2 (1%)            |
| Hinchingbrooke Hospital                                   | 3 (1%)            |
| Ipswich Hospital                                          | 17 (5%)           |
| Medway Maritime Hospital                                  | 4 (1%)            |
| Mid Yorkshire Hospitals NHS Trust                         | 26 (8%)           |
| NHS Lothian (Edinburgh)                                   | 21 (7%)           |
| Norfolk and Norwich University Hospital                   | 6 (2%)            |
| North Devon District Hospital (Barnstaple)                | 8 (3%)            |
| Nuffield Orthopaedic Centre (Oxford)                      | 84 (27%)          |
| Queen Elizabeth Hospital Birmingham                       | 2 (1%)            |
| Queen Elizabeth Hospital Kings Lynn                       | 1 (<1%)           |
| Robert Jones & Agnes Hunt Orthopaedic Hospital (Oswestry) | 3 (1%)            |
| Royal Berkshire Hospital (Reading)                        | 4 (1%)            |
| Royal Free Hospital (London)                              | 12 (4%)           |
| Russells Hall Hospital (Dudley)                           | 17 (5%)           |
| St Woolos Hospital (Gwent)                                | 20 (6%)           |
| Torbay Hospital                                           | 3 (1%)            |
| University Hospital Coventry & Warwickshire               | 8 (3%)            |
| University Hospital Llandough (Cardiff)                   | 10 (3%)           |
| University Hospital of South Manchester                   | 8 (3%)            |
| West Suffolk Hospital                                     | 10 (3%)           |
| Worcestershire Royal Hospital                             | 1 (<1%)           |
| Yeovil District Hospital                                  | 4 (1%)            |
| Total                                                     | 313               |

Supplementary Table 2. Reasons for not treated per protocol and missing assessments

| Factor                                             | Level                                                       | decompression | arthroscopy only | no treatment |
|----------------------------------------------------|-------------------------------------------------------------|---------------|------------------|--------------|
| N                                                  |                                                             | 106           | 103              | 104          |
| <b>Reasons not Treated per Protocol - 6 months</b> | no surgery                                                  | 22 (21%)      | 32 (31%)         | 0 (0%)       |
|                                                    | surgery - rotator cuff surgery                              | 4 (4%)        | 4 (4%)           | 1 (1%)       |
|                                                    | surgery - decompression                                     | 0 (0%)        | 3 (3%)           | 8 (8%)       |
|                                                    | surgery - other                                             | 4 (4%)        | 4 (4%)           | 2 (2%)       |
|                                                    | withdrawal                                                  | 0 (0%)        | 0 (0%)           | 1 (1%)       |
|                                                    | as randomized                                               | 76 (72%)      | 60 (58%)         | 92 (88%)     |
| <b>Reason OSS Missing - 6 months</b>               | staffing related reason                                     | 1 (1%)        | 1 (1%)           | 2 (2%)       |
|                                                    | participant lost - likely due to unrelated health reasons   | 1 (1%)        | 0 (0%)           | 0 (0%)       |
|                                                    | participant lost - moved and new address not known          | 1 (1%)        | 0 (0%)           | 0 (0%)       |
|                                                    | participant non-responsive                                  | 7 (7%)        | 6 (6%)           | 5 (5%)       |
|                                                    | participant withdrawal - no further reasons provided        | 0 (0%)        | 0 (0%)           | 3 (3%)       |
|                                                    | participant withdrawal - no longer wants to be involved in  |               |                  |              |
|                                                    | research study                                              | 1 (1%)        | 0 (0%)           | 0 (0%)       |
|                                                    | participant withdrawal - no time for study                  | 2 (2%)        | 0 (0%)           | 2 (2%)       |
|                                                    | participant withdrawal - surgery opt-out, no further reason |               |                  |              |
|                                                    | given                                                       | 1 (1%)        | 0 (0%)           | 0 (0%)       |
|                                                    | participant withdrawal - symptoms resolved                  | 1 (1%)        | 1 (1%)           | 0 (0%)       |
|                                                    | participant withdrawal - unhappy with randomised            |               |                  |              |
|                                                    | intervention                                                | 0 (0%)        | 0 (0%)           | 2 (2%)       |
|                                                    | participant withdrawal - unhappy with treatment received    | 1 (1%)        | 0 (0%)           | 0 (0%)       |
|                                                    | participant withdrawal - unrelated health reasons           | 0 (0%)        | 1 (1%)           | 0 (0%)       |
|                                                    | not lost                                                    | 90 (85%)      | 94 (91%)         | 90 (87%)     |

|                                                  |                                                                           |          |          |          |
|--------------------------------------------------|---------------------------------------------------------------------------|----------|----------|----------|
| <b>Reasons not Treated per Protocol – 1 year</b> | no surgery                                                                | 17 (16%) | 23 (22%) | 0 (0%)   |
|                                                  | surgery - rotator cuff surgery                                            | 5 (5%)   | 4 (4%)   | 1 (1%)   |
|                                                  | surgery - decompression                                                   | 0 (0%)   | 3 (3%)   | 18 (17%) |
|                                                  | surgery - other                                                           | 4 (4%)   | 4 (4%)   | 6 (6%)   |
|                                                  | unblinded and decompression                                               | 0 (0%)   | 1 (1%)   | 0 (0%)   |
|                                                  | withdrawal                                                                | 0 (0%)   | 0 (0%)   | 1 (1%)   |
|                                                  | as randomized                                                             | 80 (75%) | 68 (66%) | 78 (75%) |
|                                                  |                                                                           |          |          |          |
| <b>Reason OSS Missing - 1 year</b>               | staffing related reason                                                   | 0 (0%)   | 1 (1%)   | 0 (0%)   |
|                                                  | participant lost - likely due to unrelated health reasons                 | 1 (1%)   | 0 (0%)   | 0 (0%)   |
|                                                  | participant lost - moved and new address not known                        | 1 (1%)   | 0 (0%)   | 1 (1%)   |
|                                                  | participant non-responsive                                                | 10 (9%)  | 6 (6%)   | 12 (12%) |
|                                                  | participant withdrawal - no further reasons provided                      | 0 (0%)   | 0 (0%)   | 3 (3%)   |
|                                                  | participant withdrawal - no longer wants to be involved in research study | 1 (1%)   | 1 (1%)   | 0 (0%)   |
|                                                  | participant withdrawal - no time for study                                | 2 (2%)   | 0 (0%)   | 2 (2%)   |
|                                                  | participant withdrawal - surgery opt-out, no further reason given         | 1 (1%)   | 0 (0%)   | 0 (0%)   |
|                                                  | participant withdrawal - symptoms resolved                                | 1 (1%)   | 1 (1%)   | 0 (0%)   |
|                                                  | participant withdrawal - unhappy with randomised intervention             | 0 (0%)   | 0 (0%)   | 2 (2%)   |
|                                                  | participant withdrawal - unhappy with treatment received                  | 1 (1%)   | 0 (0%)   | 0 (0%)   |
|                                                  | participant withdrawal - unrelated health reasons                         | 0 (0%)   | 1 (1%)   | 0 (0%)   |
|                                                  | not lost                                                                  | 88 (83%) | 93 (90%) | 84 (81%) |

Supplementary Table 3. Participants who had surgery and surgery involving decompression

|                                   | <b>Decompression</b> | <b>Arthroscopy<br/>only</b> | <b>No treatment</b> |
|-----------------------------------|----------------------|-----------------------------|---------------------|
| <b>N randomised</b>               | <b>106</b>           | <b>103</b>                  | <b>104</b>          |
| <i>At 6 months</i>                |                      |                             |                     |
| <b>Surgery of any kind</b>        | 84 (79%)             | 71 (69%)                    | 11 (11%)            |
| <b>Surgery inc. decompression</b> | 82 (77%)             | 9 (9%)                      | 11 (11%)            |
| <i>At 1 year</i>                  |                      |                             |                     |
| <b>Surgery of any kind</b>        | 89 (84%)             | 80 (78%)                    | 25 (24%)            |
| <b>Surgery inc. decompression</b> | 87 (82%)             | 10 (10%)                    | 25 (24%)            |

Supplementary Table 4. Other – Diagnosis as assessed during surgery

| <b>No. of participant receiving<br/>operation</b> | <b>Decompression<br/>(N=89)</b> | <b>Arthroscopy only<br/>(N=80)</b> | <b>No treatment<br/>(N=24)</b> |
|---------------------------------------------------|---------------------------------|------------------------------------|--------------------------------|
| <b>Operative diagnosis – n (%)</b>                |                                 |                                    |                                |
| <b>Impingement lesion</b>                         | 67 (75%)                        | 46 (61%)                           | 18 (75%)                       |
| <b>Partial thickness tear</b>                     |                                 |                                    |                                |
| <b>bursal</b>                                     | 13 (15%)                        | 5 (7%)                             | 0 (0%)                         |
| <b>joint side</b>                                 | 18 (21%)                        | 17 (22%)                           | 2 (8%)                         |
| <b>Shape of Spur</b>                              |                                 |                                    |                                |
| <b>flat</b>                                       | 18 (21%)                        | 32 (44%)                           | 4 (17%)                        |
| <b>beaked</b>                                     | 47 (53%)                        | 33 (46%)                           | 16 (70%)                       |
| <b>hooked</b>                                     | 23 (26%)                        | 7 (10%)                            | 3 (13%)                        |

Supplementary Table 5. Non-surgical treatments during one year follow-up period

**No. of participants receiving treatment – n**

**(%)**

**Decompression**

**Arthroscopy only**

**No treatment**

**Corticosteroid injection**

2 (2%)

1 (1%)

7 (8%)

**Prescribed painkiller**

0 (0%)

2 (2%)

0 (0%)

**Over the counter medication (e.g. painkiller)**

40 (48%)

30 (34%)

31 (38%)

**Physiotherapy/chiropractic**

8 (10%)

8 (10%)

11 (14%)

**Hydrodilatation**

0 (0%)

1 (1%)

1 (1%)

Supplementary Table 6. Sensitivity analyses of the Oxford Shoulder Score (OSS)

|                                                                          | Decompression     | Arthroscopy only | No treatment      | Decompression vs<br>Arthroscopy only | Decompression vs<br>No treatment | Arthroscopy only vs<br>No treatment |
|--------------------------------------------------------------------------|-------------------|------------------|-------------------|--------------------------------------|----------------------------------|-------------------------------------|
| Analysis                                                                 | n, mean (SD)      | n, mean (SD)     | n, mean (SD)      | Mean diff. (95% CI) [p-value]        | Mean diff. (95% CI) [p-value]    | Mean diff. (95% CI) [p-value]       |
| <b>OSS at 6 months (post-surgery follow-up)*</b>                         | 35.1 (10.8) n=90  | 35.6 (9.0); n=94 |                   | -0.3 (-2.9, 2.4) [0.8286]            |                                  |                                     |
| <b>OSS at 6 months (excluding surgery within 2 months of time point)</b> | 33.8 (11.1); n=82 | 34.6 (9.1); n=85 | 29.7 (11.8); n=86 | -0.6 (-3.4, 2.1) [0.6391]            | 3.4 (0.9, 5.8) [0.0088]          | 4.1 (1.5, 6.7) [0.0033]             |
| <b>OSS at 6 months (unadjusted analysis)</b>                             |                   |                  |                   | -1.6 (-4.6, 1.5) [0.3104]            | 3.3 (-0.2, 6.8) [0.0608]         | 4.9 (1.8, 8.0) [0.0021]             |
| <b>OSS at 6 months (bootstrapped CI)‡</b>                                |                   |                  |                   | -1.3 (-4.5, 1.6)                     | 2.8 (-0.5, 5.9)                  | 4.2 (1.2, 7.3)                      |
| <b>OSS at 6 months (using response shift baseline)†</b>                  | 21.3 (8.4); n=85  | 24.6 (9.1); n=88 | 23.5 (8.9); n=81  | -0.5 (-3.4, 2.5) [0.7612]            | 5.1 (1.8, 8.3) [0.0024]          | 4.9 (1.9, 7.9) [0.0013]             |
| <b>OSS at 1 year (Post-surgery follow-up)*</b>                           | 38.4 (10.6); n=73 | 38.0 (9.4); n=87 |                   | 0.9 (-2.6, 4.4) [0.6015]             |                                  |                                     |
| <b>OSS at 1 year (excluding surgery within 2 months of time point)</b>   | 38.4 (10.2); n=87 | 38.4 (9.3); n=93 | 34.8 (11.6); n=81 | 0.5 (-2.5, 3.6) [0.7253]             | 3.7 (0.7, 6.6) [0.0186]          | 3.1 (0.2, 6.0) [0.0365]             |
| <b>OSS at 1 year (unadjusted analysis)</b>                               |                   |                  |                   | -0.2 (-3.0, 2.7) [0.9059]            | 3.9 (0.6, 7.3) [0.0204]          | 4.1 (1.0, 7.2) [0.0102]             |
| <b>OSS at 1 year (using response shift baseline)†</b>                    | 21.3 (8.4); n=85  | 24.6 (9.1); n=88 | 23.5 (8.9); n=81  | 1.1 (-1.7, 4.0) [0.4355]             | 5.0 (1.7, 8.3) [0.0029]          | 3.7 (0.6, 6.8) [0.0206]             |
| <b>OSS at 1 year (bootstrapped CI)‡</b>                                  |                   |                  |                   | 0.3 (-2.6, 3.3)                      | 3.9 (1.3, 7.0)                   | 3.6 (0.8, 6.9)                      |
| <b>Mixed Model††</b>                                                     |                   |                  |                   |                                      |                                  |                                     |
| <b>OSS at 6 months</b>                                                   | 32.7 (11.6); n=90 | 34.2 (9.2); n=94 | 29.4 (11.9); n=90 | -1.5 (-4.1, 1.2) [0.2848]            | 2.7 (-0.04, 5.5) [0.0531]        | 4.2 (1.6, 6.9) [0.0017]             |
| <b>OSS at 1 year</b>                                                     | 38.2 (10.3); n=88 | 38.4 (9.3); n=93 | 34.3 (11.8); n=84 | 0.4 (-2.3, 3.1) [0.7684]             | 3.7 (0.9, 6.5) [0.0103]          | 3.3 (0.6, 6.0) [0.0160]             |

**Notes:**

\* Substituting post-surgery follow-up score for post-randomisation where surgery delayed by 4 months or more.

† OSS asked 1 year with heading “In the weeks leading up to your treatment, can you recall how your shoulder was before you entered the study (1 year ago)?

†† Mixed model including treatment, time, and time/treatment interaction. N analysed across two groups per comparison as ordered above (n=189, 184 & 187 respectively)

‡ Bootstrapping carried out with 1000 replications, clustered sampling by site; bias corrected and accelerated method.

Supplementary Table 7. Other secondary outcomes (PainDETECT)

|                             | Decompression   | Arthroscopy only | No treatment    | Decompression vs<br>Arthroscopy only | Decompression vs No<br>treatment | Arthroscopy only vs No<br>treatment |
|-----------------------------|-----------------|------------------|-----------------|--------------------------------------|----------------------------------|-------------------------------------|
|                             |                 |                  |                 | Mean diff. (95% CI)                  | Mean diff. (95% CI) [p-          | Mean diff. (95% CI) [p-             |
| Secondary Outcome           | mean (SD)       | mean (SD)        | mean (SD)       | [p-value]                            | value]                           | value]                              |
| <i>At 6 months</i>          |                 |                  |                 |                                      |                                  |                                     |
| <b>PainDETECT Current</b>   |                 |                  |                 |                                      |                                  |                                     |
| <b>Pain</b>                 | 3.2 (2.7); n=88 | 3.2 (2.4); n=92  | 4 (2.8); n=89   | -0.1 (-0.7 , 0.4) [0.6148]           | -0.7 (-1.2 , -0.3) [0.0044]      | -0.5 (-0.9 , -0.2) [0.0033]         |
| <b>PainDETECT Strongest</b> |                 |                  |                 |                                      |                                  |                                     |
| <b>Pain</b>                 | 5.9 (3.0); n=88 | 5.7 (2.7); n=91  | 6.7 (3.0); n=89 | 0.0 (-0.7 , 0.7) [0.9963]            | -0.8 (-1.8 , 0.3) [0.1437]       | -0.7 (-1.6 , 0.3) [0.1681]          |
| <b>PainDETECT Average</b>   |                 |                  |                 |                                      |                                  |                                     |
| <b>Pain</b>                 | 4.2 (2.8); n=88 | 4.1 (2.4); n=91  | 5.0 (2.6); n=89 | -0.1 (-0.7 , 0.6) [0.8724]           | -0.6 (-1.3 , 0.2) [0.1349]       | -0.5 (-1.2 , 0.2) [0.1453]          |
| <i>At 1 year</i>            |                 |                  |                 |                                      |                                  |                                     |
| <b>PainDETECT Current</b>   |                 |                  |                 |                                      |                                  |                                     |
| <b>Pain</b>                 | 2.0 (2.3); n=85 | 2.4 (2.4); n=90  | 3.4 (2.9); n=81 | -0.4 (-1.2 , 0.3) [0.2449]           | -1.4 (-2.0 , -0.7) [0.0002]      | -0.9 (-1.6 , -0.2) [0.0125]         |
| <b>PainDETECT Strongest</b> |                 |                  |                 |                                      |                                  |                                     |
| <b>Pain</b>                 | 4.3 (3.4); n=85 | 4.5 (3.3); n=90  | 5.6 (3.2); n=81 | -0.5 (-1.6 , 0.7) [0.4339]           | -1.3 (-2.1 , -0.4) [0.0043]      | -0.8 (-1.9 , 0.3) [0.1518]          |
| <b>PainDETECT Average</b>   |                 |                  |                 |                                      |                                  |                                     |
| <b>Pain</b>                 | 2.9 (2.5); n=85 | 3.0 (2.6); n=88  | 4.1 (3); n=81   | -0.3 (-1.1 , 0.5) [0.4390]           | -1.3 (-1.9 , -0.6) [0.0008]      | -1.0 (-1.8 , -0.1) [0.0355]         |



Supplementary Table 8. Patient Perceptions/Satisfaction

| Factor                                                                                                           |                                                     | Level |  | Decompression | Arthroscopy only | No treatment |  | P values                                                                                                                                           |
|------------------------------------------------------------------------------------------------------------------|-----------------------------------------------------|-------|--|---------------|------------------|--------------|--|----------------------------------------------------------------------------------------------------------------------------------------------------|
|                                                                                                                  | Patient Perception/Satisfaction at 6 Months – n (%) |       |  |               |                  |              |  |                                                                                                                                                    |
| How are the problems relating to your shoulder NOW, compared to 6 months ago (before your randomised treatment)? | no problems at all now                              |       |  | 5 (6%)        | 4 (4%)           | 4 (4%)       |  | Decompression vs arthroscopy only<br>P=0.5710<br><br>Decompression vs no treatment<br>P=0.0165<br><br>Arthroscopy only vs no treatment<br>P=0.0075 |
|                                                                                                                  | much better                                         |       |  | 44 (51%)      | 35 (38%)         | 23 (26%)     |  |                                                                                                                                                    |
|                                                                                                                  | slightly better                                     |       |  | 10 (11%)      | 29 (31%)         | 16 (18%)     |  |                                                                                                                                                    |
|                                                                                                                  | no change                                           |       |  | 7 (8%)        | 13 (14%)         | 25 (28%)     |  |                                                                                                                                                    |
|                                                                                                                  | slightly worse                                      |       |  | 11 (13%)      | 8 (9%)           | 12 (13%)     |  |                                                                                                                                                    |
|                                                                                                                  | much worse                                          |       |  | 10 (11%)      | 4 (4%)           | 9 (10%)      |  |                                                                                                                                                    |
|                                                                                                                  | not indicated / missing                             |       |  | 19            | 10               | 15           |  |                                                                                                                                                    |
|                                                                                                                  |                                                     |       |  |               |                  |              |  |                                                                                                                                                    |
| Overall, how pleased have you been with the results of your randomised shoulder treatment?                       | very pleased                                        |       |  | 42 (49%)      | 36 (43%)         | 30 (34%)     |  | Decompression vs arthroscopy only<br>P=0.6400<br><br>Decompression vs no treatment<br>P=0.0050<br><br>Arthroscopy only vs no treatment<br>P=0.0086 |
|                                                                                                                  | fairly pleased                                      |       |  | 28 (33%)      | 35 (42%)         | 23 (26%)     |  |                                                                                                                                                    |
|                                                                                                                  | not very pleased                                    |       |  | 9 (11%)       | 10 (12%)         | 23 (26%)     |  |                                                                                                                                                    |
|                                                                                                                  | very disappointed                                   |       |  | 6 (7%)        | 3 (4%)           | 12 (14%)     |  |                                                                                                                                                    |
|                                                                                                                  | not indicated / missing                             |       |  | 21            | 19               | 16           |  |                                                                                                                                                    |
|                                                                                                                  |                                                     |       |  |               |                  |              |  |                                                                                                                                                    |
| If you could go back in time, would you choose the treatment you were allocated to?                              | no                                                  |       |  | 7 (8%)        | 8 (9%)           | 29 (33%)     |  | Decompression vs arthroscopy only<br>P=0.9638<br><br>Decompression vs no treatment<br>P=0.0074<br><br>Arthroscopy only vs no treatment<br>P=0.0082 |
|                                                                                                                  | yes                                                 |       |  | 60 (70%)      | 57 (67%)         | 41 (47%)     |  |                                                                                                                                                    |
|                                                                                                                  | not sure                                            |       |  | 19 (22%)      | 20 (24%)         | 18 (20%)     |  |                                                                                                                                                    |
|                                                                                                                  | not indicated / missing                             |       |  | 20            | 18               | 16           |  |                                                                                                                                                    |
|                                                                                                                  | Patient Perception/Satisfaction at 1 year – n (%)   |       |  |               |                  |              |  |                                                                                                                                                    |
| How are the problems relating to your shoulder NOW,                                                              | no problems at all now                              |       |  | 18 (21%)      | 17 (18%)         | 10 (13%)     |  | Decompression vs arthroscopy only<br>P=0.3609                                                                                                      |
|                                                                                                                  | much better                                         |       |  | 44 (51%)      | 41 (45%)         | 33 (41%)     |  |                                                                                                                                                    |

|                                                                                                   |                         |  |          |          |          |  |                                                                                                                                                    |
|---------------------------------------------------------------------------------------------------|-------------------------|--|----------|----------|----------|--|----------------------------------------------------------------------------------------------------------------------------------------------------|
| <b>compared to 1 year ago (before your randomised treatment)?</b>                                 | slightly better         |  | 10 (11%) | 18 (20%) | 12 (15%) |  | Decompression vs no treatment<br>P=0.0119<br><br>Arthroscopy only vs no treatment<br>P=0.0903                                                      |
|                                                                                                   | no change               |  | 12 (14%) | 9 (10%)  | 18 (23%) |  |                                                                                                                                                    |
|                                                                                                   | slightly worse          |  | 2 (2%)   | 5 (5%)   | 2 (3%)   |  |                                                                                                                                                    |
|                                                                                                   | much worse              |  | 1 (1%)   | 2 (2%)   | 5 (6%)   |  |                                                                                                                                                    |
|                                                                                                   | not indicated / missing |  | 19       | 11       | 24       |  |                                                                                                                                                    |
|                                                                                                   |                         |  |          |          |          |  |                                                                                                                                                    |
| <b>Overall, how pleased have you been with the results of your randomised shoulder treatment?</b> | very pleased            |  | 53 (62%) | 44 (48%) | 34 (43%) |  | Decompression vs arthroscopy only<br>P=0.0804<br><br>Decompression vs no treatment<br>P=0.0057<br><br>Arthroscopy only vs no treatment<br>P=0.1917 |
|                                                                                                   | fairly pleased          |  | 18 (21%) | 29 (32%) | 18 (23%) |  |                                                                                                                                                    |
|                                                                                                   | not very pleased        |  | 9 (11%)  | 12 (13%) | 17 (22%) |  |                                                                                                                                                    |
|                                                                                                   | very disappointed       |  | 5 (6%)   | 7 (8%)   | 10 (13%) |  |                                                                                                                                                    |
|                                                                                                   | missing                 |  | 21       | 11       | 25       |  |                                                                                                                                                    |
|                                                                                                   |                         |  |          |          |          |  |                                                                                                                                                    |
| <b>If you could go back in time, would you choose the treatment you were allocated to?</b>        | no                      |  | 8 (9%)   | 10 (11%) | 20 (25%) |  | Decompression vs arthroscopy only<br>P=0.4237<br><br>Decompression vs no treatment<br>P=0.1218<br><br>Arthroscopy only vs no treatment<br>P=0.3263 |
|                                                                                                   | yes                     |  | 63 (73%) | 70 (76%) | 44 (56%) |  |                                                                                                                                                    |
|                                                                                                   | not sure                |  | 15 (17%) | 12 (13%) | 15 (19%) |  |                                                                                                                                                    |
|                                                                                                   | missing                 |  | 20       | 18       | 16       |  |                                                                                                                                                    |

Supplementary Table 9. Other secondary outcomes (Patient reported outcomes)

| Factor                                                                     | Level                                                                                                       |  | Decompression | Arthroscopy only | No treatment | Total     | P values                                      |
|----------------------------------------------------------------------------|-------------------------------------------------------------------------------------------------------------|--|---------------|------------------|--------------|-----------|-----------------------------------------------|
|                                                                            | <b>Any problems at 6 Months – n (%)</b>                                                                     |  |               |                  |              |           |                                               |
| <b>Do you have any problem (movement or pain) with the other shoulder?</b> | no                                                                                                          |  | 52 (60%)      | 65 (71%)         | 60 (68%)     | 177 (67%) | Decompression vs Arthroscopy only<br>P=0.1215 |
|                                                                            | yes - a new problem since randomisation                                                                     |  | 7 (8%)        | 8 (9%)           | 14 (16%)     | 29 (11%)  |                                               |
|                                                                            | yes - a long standing problem                                                                               |  | 27 (31%)      | 19 (21%)         | 14 (16%)     | 60 (23%)  | Decompression vs no treatment<br>P=0.1250     |
|                                                                            | missing                                                                                                     |  | 20            | 11               | 16           | 47        | Arthroscopy only vs no treatment<br>P=0.9353  |
|                                                                            | <b>Any problems at 1 year – n (%)</b>                                                                       |  |               |                  |              |           |                                               |
| <b>Do you have any problem (movement or pain) with the other shoulder?</b> | no                                                                                                          |  | 56 (65%)      | 60 (65%)         | 55 (67%)     | 171 (66%) | Decompression vs Arthroscopy only<br>P=0.9423 |
|                                                                            | yes - a new problem since randomisation                                                                     |  | 13 (15%)      | 15 (16%)         | 16 (20%)     | 44 (17%)  |                                               |
|                                                                            | yes - a long standing problem                                                                               |  | 17 (20%)      | 17 (18%)         | 11 (13%)     | 45 (17%)  | Decompression vs no treatment<br>P=0.6131     |
|                                                                            | missing                                                                                                     |  | 20            | 11               | 22           | 53        | Arthroscopy only vs no treatment<br>P=0.6566  |
|                                                                            | <b>Treatment Expectation – Are the results of your treatment what you expected? Asked at 1 year – n (%)</b> |  |               |                  |              |           |                                               |
| <b>Relief from symptoms</b>                                                | definitely yes                                                                                              |  | 36 (44%)      | 29 (34%)         | 18 (23%)     | 83 (34%)  | Decompression vs Arthroscopy only<br>P=0.0639 |
|                                                                            | probably yes                                                                                                |  | 28 (34%)      | 25 (29%)         | 27 (35%)     | 80 (33%)  |                                               |
|                                                                            | not sure                                                                                                    |  | 6 (7%)        | 12 (14%)         | 12 (16%)     | 30 (12%)  | Decompression vs no treatment                 |

|                                       |                |  |          |          |          |           |                                                  |
|---------------------------------------|----------------|--|----------|----------|----------|-----------|--------------------------------------------------|
|                                       | probably not   |  | 8 (10%)  | 10 (12%) | 10 (13%) | 28 (11%)  | P=0.0019                                         |
|                                       | definitely not |  | 4 (5%)   | 9 (11%)  | 10 (13%) | 23 (9%)   | Arthroscopy only<br>vs no treatment<br>P=0.2330  |
|                                       | missing        |  | 24       | 18       | 27       | 69        |                                                  |
|                                       |                |  |          |          |          |           |                                                  |
| <b>To do more everyday activities</b> | definitely yes |  | 44 (54%) | 37 (44%) | 22 (29%) | 103 (42%) | Decompression vs<br>Arthroscopy only<br>P=0.0899 |
|                                       | probably yes   |  | 24 (29%) | 25 (30%) | 25 (32%) | 74 (30%)  |                                                  |
|                                       | not sure       |  | 5 (6%)   | 2 (2%)   | 14 (18%) | 21 (9%)   |                                                  |
|                                       | probably not   |  | 7 (9%)   | 10 (12%) | 10 (13%) | 27 (11%)  | Decompression vs<br>no treatment<br>P=0.0004     |
|                                       | definitely not |  | 2 (2%)   | 10 (12%) | 6 (8%)   | 18 (7%)   |                                                  |
|                                       | not indicated  |  | 24       | 19       | 27       | 70        | Arthroscopy only<br>vs no treatment<br>P=0.1067  |
|                                       |                |  |          |          |          |           |                                                  |
|                                       |                |  |          |          |          |           |                                                  |
| <b>To sleep more comfortably</b>      | definitely yes |  | 44 (54%) | 35 (41%) | 24 (31%) | 103 (42%) | Decompression vs<br>Arthroscopy only<br>P=0.0568 |
|                                       | probably yes   |  | 20 (25%) | 23 (27%) | 27 (35%) | 70 (29%)  |                                                  |
|                                       | not sure       |  | 6 (7%)   | 11 (13%) | 6 (8%)   | 23 (9%)   | Decompression vs<br>no treatment<br>P=0.0034     |
|                                       | probably not   |  | 6 (7%)   | 8 (9%)   | 8 (10%)  | 22 (9%)   |                                                  |
|                                       | definitely not |  | 5 (6%)   | 9 (10%)  | 12 (16%) | 26 (11%)  | Arthroscopy only<br>vs no treatment<br>P=0.2864  |
|                                       | missing        |  | 25       | 17       | 27       | 69        |                                                  |
|                                       |                |  |          |          |          |           |                                                  |
| <b>To get back to my usual job</b>    | definitely yes |  | 36 (59%) | 38 (57%) | 16 (30%) | 90 (50%)  | Decompression vs<br>Arthroscopy only<br>P=0.5868 |
|                                       | probably yes   |  | 15 (25%) | 14 (21%) | 19 (36%) | 48 (27%)  |                                                  |
|                                       | not sure       |  | 2 (3%)   | 3 (4%)   | 7 (13%)  | 12 (7%)   | Decompression vs<br>no treatment                 |

|                                                   |                   |  |          |          |          |          |                                                  |
|---------------------------------------------------|-------------------|--|----------|----------|----------|----------|--------------------------------------------------|
|                                                   | probably not      |  | 4 (7%)   | 3 (4%)   | 7 (13%)  | 14 (8%)  | P=0.0034                                         |
|                                                   | definitely not    |  | 4 (7%)   | 9 (13%)  | 4 (8%)   | 17 (9%)  | Arthroscopy only<br>vs no treatment<br>P=0.0235  |
|                                                   | missing           |  | 45       | 36       | 51       | 132      |                                                  |
|                                                   |                   |  |          |          |          |          |                                                  |
| <b>To exercise and to recreational activities</b> | not at all likely |  | 6 (8%)   | 10 (12%) | 10 (13%) | 26 (11%) | Decompression vs<br>Arthroscopy only<br>P=0.0524 |
|                                                   | slightly likely   |  | 14 (18%) | 18 (22%) | 15 (19%) | 47 (20%) | Decompression vs<br>no treatment<br>P=0.0265     |
|                                                   | somewhat likely   |  | 12 (16%) | 20 (24%) | 20 (26%) | 52 (22%) |                                                  |
|                                                   | very likely       |  | 19 (25%) | 17 (20%) | 19 (25%) | 55 (23%) | Arthroscopy only<br>vs no treatment<br>P=0.8203  |
|                                                   | extremely likely  |  | 26 (34%) | 18 (22%) | 13 (17%) | 57 (24%) |                                                  |
|                                                   | missing           |  | 29       | 20       | 27       | 76       |                                                  |
|                                                   |                   |  |          |          |          |          |                                                  |
| <b>To prevent future disability</b>               | not at all likely |  | 6 (8%)   | 10 (13%) | 15 (22%) | 31 (14%) | Decompression vs<br>Arthroscopy only<br>P=0.0984 |
|                                                   | slightly likely   |  | 14 (20%) | 12 (15%) | 15 (22%) | 41 (19%) | Decompression vs<br>no treatment<br>P=0.0067     |
|                                                   | somewhat likely   |  | 9 (13%)  | 22 (28%) | 14 (20%) | 45 (21%) |                                                  |
|                                                   | very likely       |  | 22 (31%) | 23 (29%) | 14 (20%) | 59 (27%) | Arthroscopy only<br>vs no treatment<br>P=0.1473  |
|                                                   | extremely likely  |  | 20 (28%) | 12 (15%) | 11 (16%) | 43 (20%) |                                                  |
|                                                   | missing           |  | 35       | 24       | 35       | 94       |                                                  |

Supplementary Table 10. Reasons for study participants not undergoing surgery (12 months).

|  | Randomised to    | Surgery not performed due to | Note                                                                                                                                                                                                                    |
|--|------------------|------------------------------|-------------------------------------------------------------------------------------------------------------------------------------------------------------------------------------------------------------------------|
|  | Arthroscopy only | Participant choice           | Phobia of anaesthetic                                                                                                                                                                                                   |
|  | Arthroscopy only | Participant choice           | Study withdrawal prior to surgery                                                                                                                                                                                       |
|  | Arthroscopy only | Participant choice           | Study withdrawal prior to surgery                                                                                                                                                                                       |
|  | Arthroscopy only | Participant choice           | Study withdrawal prior to surgery                                                                                                                                                                                       |
|  | Arthroscopy only | Clinically indicated         | No reason given                                                                                                                                                                                                         |
|  | Arthroscopy only | Participant choice           | Surgery opt-out                                                                                                                                                                                                         |
|  | Arthroscopy only | Participant choice           | Participant removed themselves from surgical waiting list – no reason given                                                                                                                                             |
|  | Arthroscopy only | Clinically indicated         | Unrelated medical condition – medically unfit for surgery                                                                                                                                                               |
|  | Arthroscopy only | Participant choice           | Surgery opt-out                                                                                                                                                                                                         |
|  | Arthroscopy only | Participant choice           | Surgery opt-out                                                                                                                                                                                                         |
|  | Arthroscopy only | Participant choice           | Surgery opt-out                                                                                                                                                                                                         |
|  | Arthroscopy only | Waiting list/Unclear         | Participant's surgery was delayed due to waiting list. The local research officer noted that the pt had been removed from surgical waiting list - reason given was 'pain resolved'.                                     |
|  | Arthroscopy only | Participant choice           | Surgery opt-out                                                                                                                                                                                                         |
|  | Arthroscopy only | Clinically indicated         | No reason given                                                                                                                                                                                                         |
|  | Arthroscopy only | Clinically indicated         | Participant surgery was delayed due to hip surgery taking priority. Dr advised that clinically shoulder surgery is no longer required. Removed from waiting list, discharged and referred back to general practitioner. |
|  | Arthroscopy only | Participant choice           | Surgery opt-out                                                                                                                                                                                                         |
|  | Arthroscopy only | Participant choice           | Surgery opt-out due to symptoms resolved                                                                                                                                                                                |
|  | Arthroscopy only | Participant choice           | Surgery opt-out                                                                                                                                                                                                         |
|  | Arthroscopy only | Clinically indicated         | Unrelated medical condition – participant was not considered to be fit for surgery within CSAW study follow-up period.                                                                                                  |
|  | Arthroscopy only | Participant choice           | Surgery opt-out – no further routine hospital appointments have been scheduled                                                                                                                                          |
|  | Arthroscopy only | Participant choice           | Surgery opt-out – surgery delayed due to waiting list delays                                                                                                                                                            |
|  | Arthroscopy only | Participant choice           | Surgery opt-out                                                                                                                                                                                                         |
|  | Arthroscopy only | Waiting list                 | Surgery delayed                                                                                                                                                                                                         |
|  | Decompression    | Participant choice           | Study withdrawal prior to surgery                                                                                                                                                                                       |

|  |               |                              |                                                                                                                                                           |
|--|---------------|------------------------------|-----------------------------------------------------------------------------------------------------------------------------------------------------------|
|  | Decompression | Participant choice           | Participant no longer wants surgery as symptoms have resolved – removed from waiting list                                                                 |
|  | Decompression | Waiting list/unclear         | Surgery not performed - did not have surgery during study period due to waiting list. Converted to 'normal clinical pathway'                              |
|  | Decompression | Participant choice           | Participant requested surgery opt-out and then study withdrawal.                                                                                          |
|  | Decompression | Participant choice           | Participant delayed surgery as symptoms resolving, then requested study withdrawal when RN made contact to arrange 12 month follow-up.                    |
|  | Decompression | Participant choice           | Study withdrawal prior to surgery                                                                                                                         |
|  | Decompression | Clinically indicated/unclear | Treatment for unrelated medical condition took precedence – reported as lost to follow-up at 6 & 12 months.                                               |
|  | Decompression | Participant choice           | Participant deferred surgery, no response to contact from local CSAW team. No surgery performed within the local trust and no further visits to hospital. |
|  | Decompression | Participant choice           | Participant did not attend a number of routine hospital appointments including pre-op assessment, they were removed from the surgical waiting list.       |
|  | Decompression | Participant choice           | Surgery opt-out                                                                                                                                           |
|  | Decompression | Clinically indicated         | Unrelated medical condition – participant was no longer fit for surgery                                                                                   |
|  | Decompression | Participant choice           | Surgery opt-out                                                                                                                                           |
|  | Decompression | Clinically indicated         | Unrelated medical condition – participant was no longer fit for surgery                                                                                   |
|  | Decompression | Participant choice           | Surgery opt-out                                                                                                                                           |
|  | Decompression | Participant choice           | Surgery opt-out                                                                                                                                           |
|  | Decompression | Waiting list                 | Surgery delayed                                                                                                                                           |
|  | Decompression | Waiting list                 | Surgery delayed                                                                                                                                           |

Supplementary Figure 1. Oxford Shoulder Score from 'Per protocol' analyses by follow-up time point (mean with 95% confidence interval). Statistical comparisons denoted by letter. A = decompression v arthroscopy only, B= decompression v no treatment, C=arthroscopy only v no treatment.

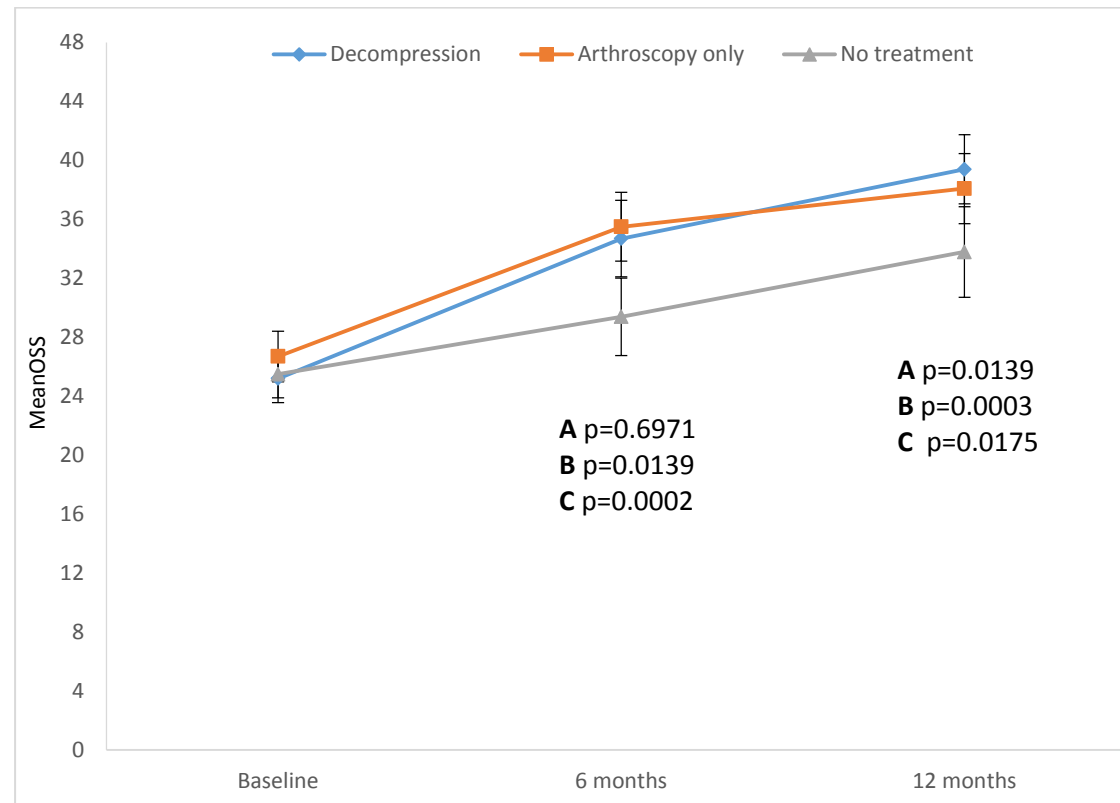

Supplementary Figure 2. Sensitivity of Decompression versus Arthroscopy only comparison of OSS to missing data not at random using a PMM (pattern mixture model) approach

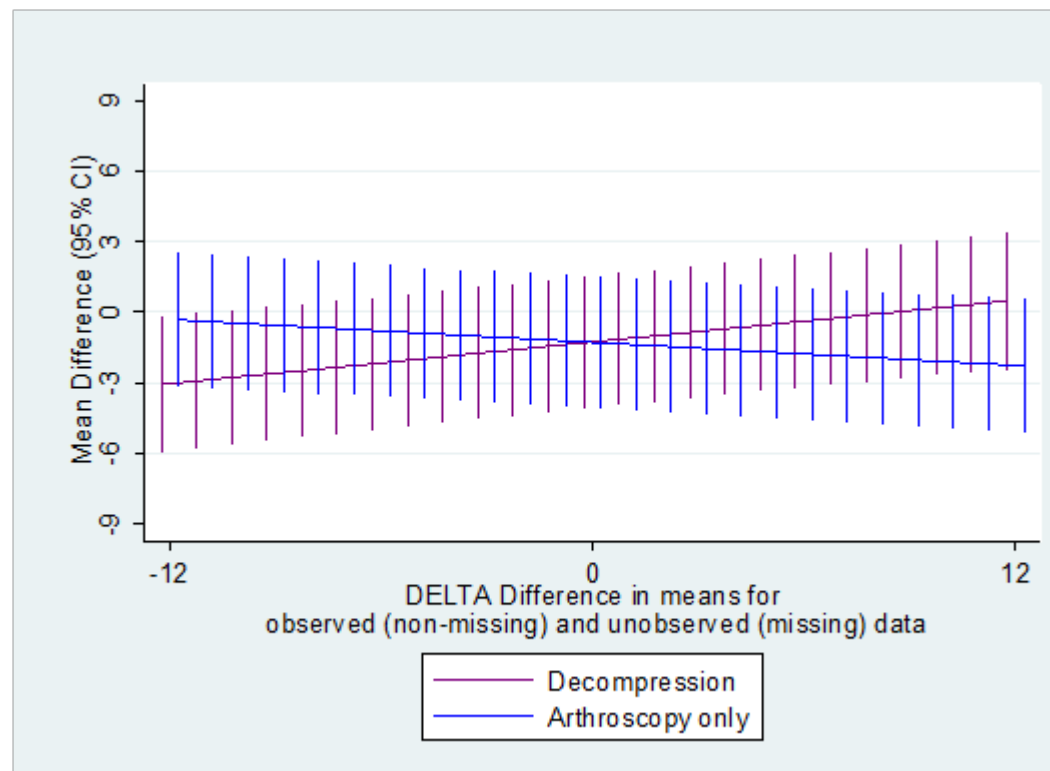

Supplementary Figure 3. Sensitivity of Decompression vs no treatment comparison of OSS to missing data not at random using a PMM (pattern mixture model) approach

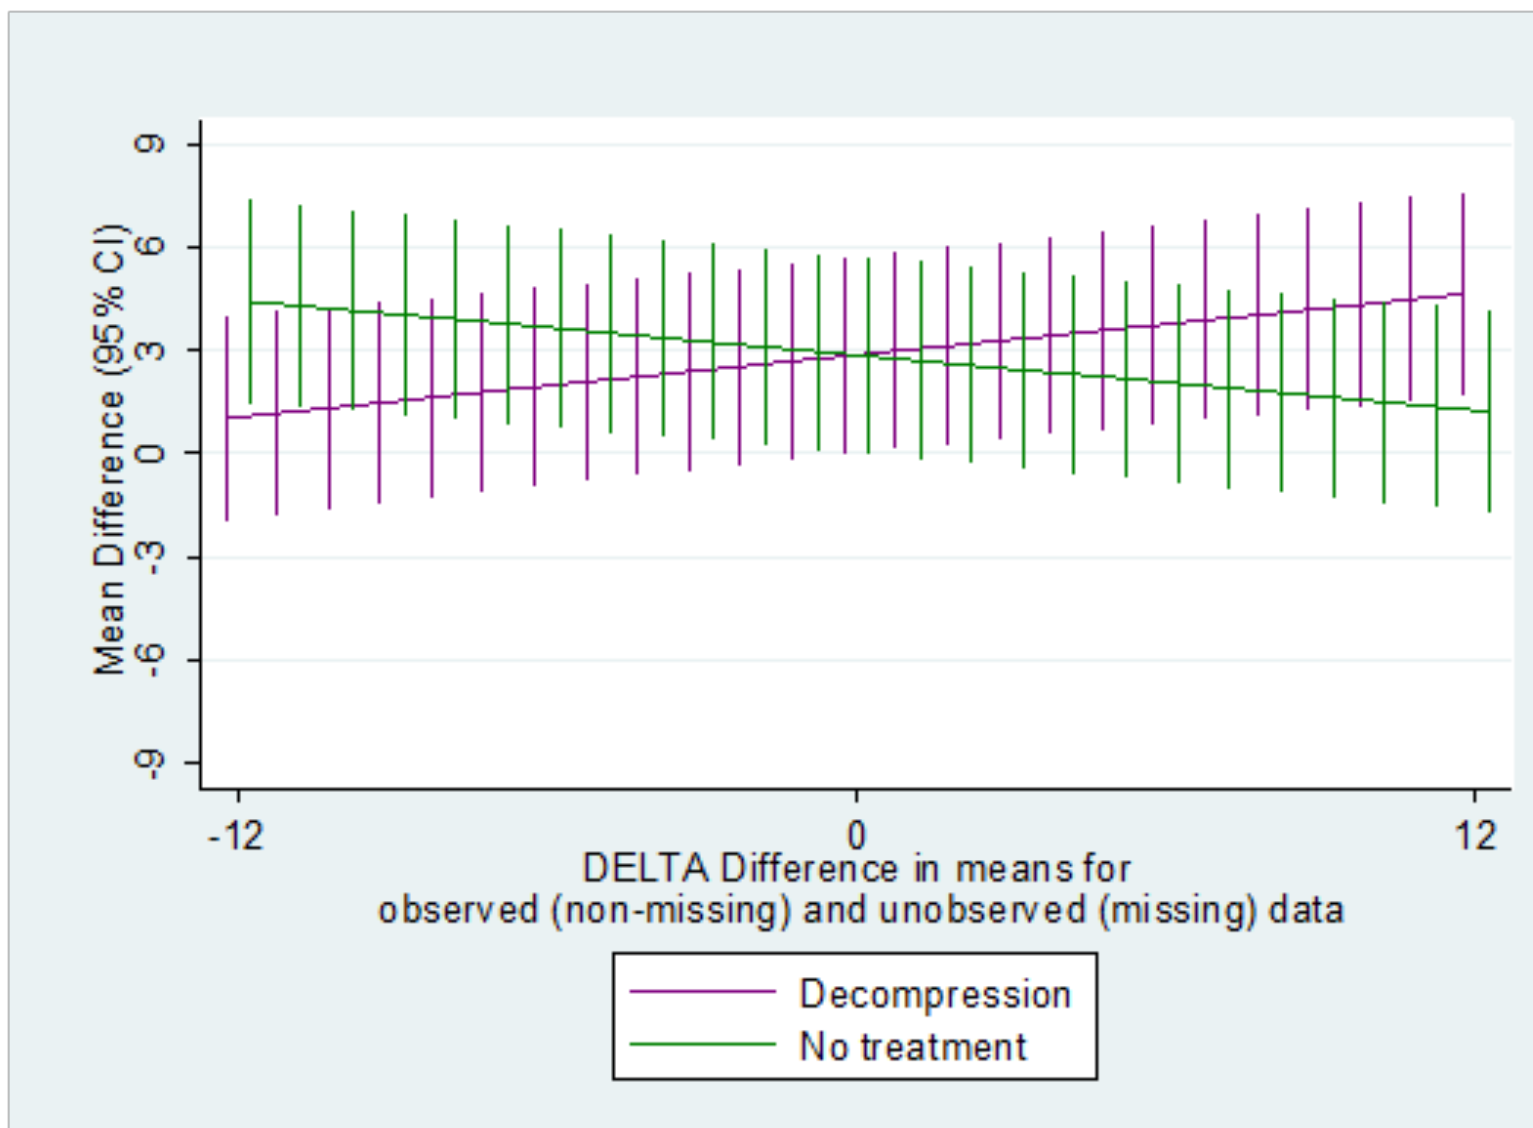

Supplementary Figure 4. Sensitivity of Arthroscopy only vs no treatment comparison of OSS to missing data not at random using a PMM (pattern mixture model) approach

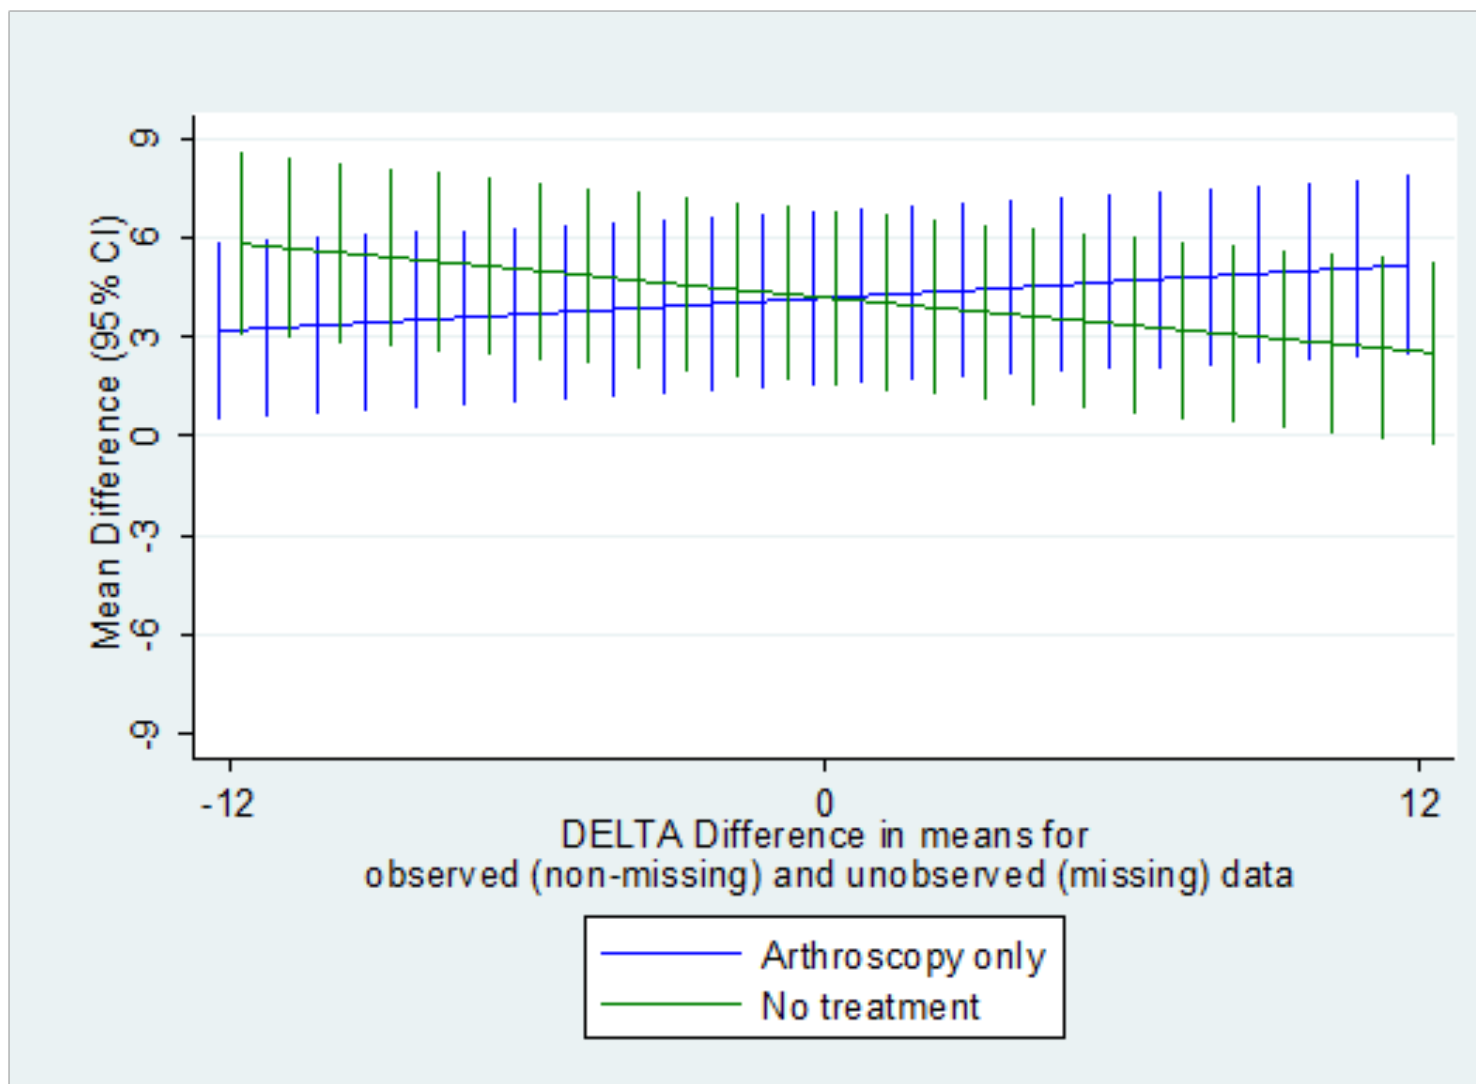

Supplement: mmc1.pdf [file mmc1.pdf]
